# Supplementary material for: Some characters of bacterial cellulases in goats’ rumen elucidated by metagenomic DNA analysis and the role of fibronectin 3 module for endoglucanase function
Source: PubMed Central journal article supplement (PMC8100471; doi:10.5713/ajas.20.0115), 2020-08-21
Supplement: ajas-20-0115-suppl.pdf [file ajas-20-0115-suppl.pdf]

## Supporting information

**TABLE S1.** The sequence of the *xfn3gh5* gene. *Italic characters coding for X domain; shaded sequence is for FN3 module; underlined sequence is catalytic domain GH5*

ccatg *gcg gtg ccg gtt ggt agc ggt gac aac gcg gtg att aac agc att acc gcg gag gcg*  
*M A V P V G S G D N A V I N S I T A E A*  
*gcg acc gtg agc gtt ccg aag gtg acc ggt ctg aaa agc cag acc ctg ggc acc gat aag*  
*A T V S V P K V T G L K S Q T L G T D K*  
*gtt aaa ctg acc tgg aac agc att agc aac gcg acc ggt tac cag gtg ttc atg cag aag*  
*V K L T W N K I S N A T G Y Q V F M Q K*  
*aac ggc gtt tat acc cgt ctg att agc atc tac agc aac acc aac agc tat acc gtg agc*  
*N G V Y T R L I S I Y S N T N S Y T V S*  
*aac ctg ccg gcg gcg cgt atc acc aac ctg aaa gtg cgt gcg tgg cgt acc gtt ggt ggc*  
*N L P A A R I T N L K V R A W R T V G G*  
*aaa aac tac ttt ggt ccg ctg agc* *gcg gcg cgt acc acc gcg acc aac* *ccg gcg aag gtt*  
*K N Y F G P L S A A R T T A T N P A K V*  
*acc aac att cag agc acc gcg ggc agc acc agc atc aag ttt acc tgg aac aaa gtg aac*  
*T N I Q S T A G S T S I K F T W N K V N*  
*tgc agc tac tat cgt att tac gtt aag caa gcg gac ggc aag tgg aaa ggc ctg aaa aac*  
*C S Y Y R I Y V K Q A D G K W K G L K N*  
*agc acc acc aac agc gtg acc gtt acc ggt ctg aac gcg aac acc agc tat acc ttt tgc*  
*S T T N S V T V T G L N A N T S Y T F C*  
*gtg cgt gcg tgg caa acc gac tgg agc aag aaa gat cac ggc agc gtt ctg agc gat aac*  
*V R A W Q T D W S K K D H G S V L S D N*  
*gtg acc gtt aag acc* *aaa acc gcg gcg acc ccg gtg gcg gcg aac ggt cgt ctg agc gtg*  
*V T V K T K T A A T P V A A N G R L S V*  
*aag ggc gcg aac atc* *gtt aac cag agc ggt caa att ttc aag atc aag ggt atg agc acc*  
*K G A N I V N Q S G Q I F K I K G M S T*  
*cac ggc att atg tgg gag gac ttt cgt aac atc ctg agc tac aac agc ctg aag gtt ctg*  
*H G I M W E D F R N I L S Y N S L K V L*  
*cgt gac gat tgg aaa tgc aac acc att cgt atc gcg atg tat acc gcg gag tgg ggt ggc*  
*R D D W K C N T I R I A M Y T A E W G G*  
*tac acc acc ggt agc acc tat gcg gcg cag gcg aag gcg cgt gtg aaa gcg ggt gtt gaa*  
*Y T T G S T Y A A Q A K A R V K A G V E*  
*aac gcg aaa agc gcg ggc atg tac gcg atc att gac tgg cac atc ctg agc gac ggt gat*  
*N A K S A G M Y A I I D W H I L S D G D*  
*ccg cgt acc cac cag agc caa gcg gtt gcg ttc ttt aag gaa atg gcg aac acc tac aag*  
*P R T H Q S Q A V A F F K E M A N T Y K*  
*aac tac gat aac gtg atc tac gaa atc tgc aac gaa ccg aac ggt ggc gtt acc tgg aac*  
*N Y D N V I Y E I C N E P N G V T W N*  
*ggt ggc att aag agc tac tgc cag gcg gtg gtt aac gcg atc cgt caa tat gat aaa aac*  
*G G I K S Y C Q A V V N A I R Q Y D K N*  
*gcg atc att atc tgc ggc acc ggc acc tgg agc caa gac atc gat aag gtg ctg ggt aac*  
*A I I I C G T G T W S Q D I D K V L G N*  
*cgt ctg agc gac aaa aac tgc gtt tac gcg ctg cac ttc tat gcg aac acc cac acc gat*  
*R L S D K N C V Y A L H F Y A N T H T D*  
*tgg ctg cgt agc cgt ctg aag agc tgc tac aac agc ggc ctg ccg gtg ctg gtt agc gag*  
*W L R S R L K S C Y N S G L P V L V S E*  
*ttc ggc acc tgc gat gcg agc ggt aac ggt ggc ttt aac aag tac cag acc caa gaa tgg*  
*F G T C D A S G N G G F N K Y Q T Q E W*  
*ctg aag ctg tgc gat agc ctg aaa gtg ggt tat att aac tgg agc gcg gcg aac aaa agc*  
*L K L C D S L K V G Y I N W S A A N K S*  
*gaa acc gcg agc gcg ttt aag acc ggc acc gac ctg aaa agc att acc gcg ggc acc agc*  
*E T A S A F K T G T D L K S I T A G T S*  
*cag ctg acc gaa agc ggc aaa ctg gtt cgt gat tgg tat cgt gcg cac ctc gag*  
*Q L T E S G K L V R D W Y R A H L E*

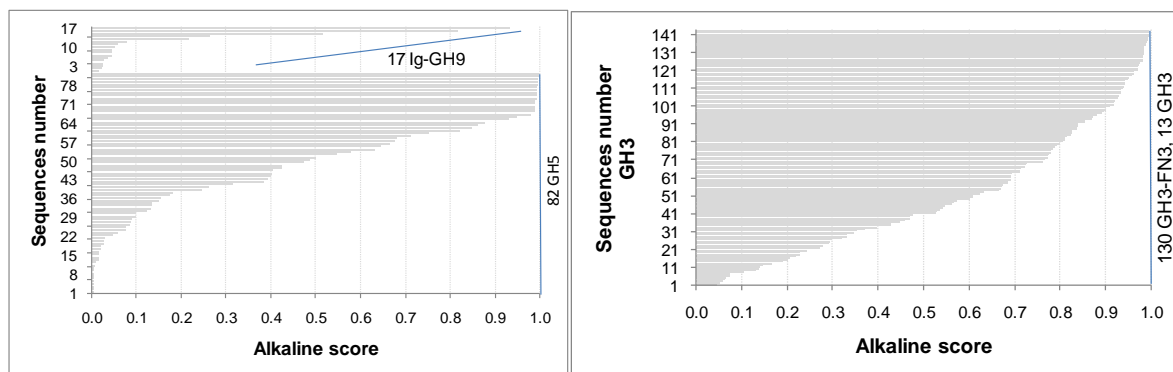

**Figure S1.** Prediction of alkaline enzymes GH3, GH5, GH9 based on sequences

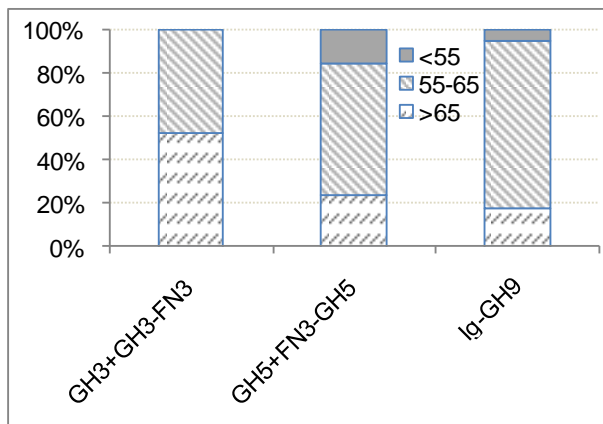

**Figure S2.** Prediction of the temperature melting of putative cellulase GH3, GH3-FN3, GH5, FN3-GH5, Ig-GH9 based on amino acid sequence
